# Supplementary material for: Facile synthesis of porous Ag3PO4 photocatalysts with high self-stability and activity
Source: Royal Society of Chemistry journal article supplement (doi:10.1039/c6ra07398k), 2016-01-01
Supplement: c6ra07398k1.pdf [file c6ra07398k1.pdf]

Supporting Information for

## Facile synthesis of porous $\text{Ag}_3\text{PO}_4$ photocatalysts with high self-stability and activity

Hongchao Yu,<sup>a,b,c</sup> Zhengbo Jiao,<sup>a</sup> Bingjun Jin,<sup>a</sup> Chenchen Feng,<sup>c</sup> Gongxuan Lu,<sup>\*a</sup> and Yingpu Bi<sup>\*a</sup>

<sup>a</sup> State Key Laboratory for Oxo Synthesis & Selective Oxidation, and National Engineering Research Center for Fine Petrochemical Intermediates, Lanzhou Institute of Chemical Physics, CAS, Lanzhou 730000, China.

<sup>b</sup> University of Chinese Academy of Sciences, Beijing 100049, China.

<sup>c</sup> Lanzhou University, Lanzhou 730000, China.

Email: [yingpubi@licp.cas.cn](mailto:yingpubi@licp.cas.cn)

### Experimental Section

#### 1. Materials

All chemicals were of analytical grade and used as received without further purification. And all chemicals were purchased from Sinopharm Chemical Reagent Co. Ltd. (China). Deionized water with a resistivity of 18.25 M $\Omega$ .cm was used in all reactions.

#### 2. Preparation of $\text{Ag}_3\text{PO}_4$ microrods

The hollow porous  $\text{Ag}_3\text{PO}_4$  microrods were fabricated by anion exchange route using  $\text{Ag}_2\text{WO}_4$  as raw material.  $\text{Ag}_2\text{WO}_4$  microrods were firstly achieved by a simple precipitation reaction between  $\text{Ag}^+$  and  $\text{WO}_4^{2-}$  ions in distilled water. In a typical synthesis,  $\text{AgNO}_3$  (0.05g) was dissolved in 200 mL aqueous solution,  $\text{Na}_2\text{WO}_4$  aqueous solution (0.01 M) was added to the above solution, and  $\text{Ag}_2\text{WO}_4$  white precipitation would be formed. The obtained  $\text{Ag}_2\text{WO}_4$  samples for morphology analysis and subsequently preparation were washed with distilled water and dried under atmosphere. In a typical anion exchange synthesis procedure, the obtained microrods were distributed evenly in the water under vigorous magnetic stirring, then,  $\text{Na}_2\text{HPO}_4$  aqueous solution (0.05 M) was added with drop by drop to form yellow suspension. The whole anion exchange process will be finished in 10 min. Then, the  $\text{Ag}_3\text{PO}_4$  hollow porous microrods obtained were collected by centrifugation and washing with deionized water.

#### 3. Photodegradation Tests

Rhodamine B (RhB) and methyl orange (MO) were employed as representative pollutants to

test the photocatalytic properties of the hollow porous  $\text{Ag}_3\text{PO}_4$  microrods. Experimental details were as follows: a 100 mL RhB and MO solution with an initial concentration of 8 mg/L in the presence of the catalyst (0.2 g) was mixed. Before light irradiating, the suspension was magnetically stirred in the dark for 20 min to ensure the adsorption-desorption equilibrium. Then, the reaction system was irradiated with a 300 W Xe arc lamp equipped with an ultraviolet cutoff filter to provide visible light with  $\lambda \geq 420$  nm. The concentration change of RhB and MO remaining in the solution was monitored by a UV-vis spectrometer at 554 nm and 464 nm, respectively. Before the spectroscopy measurement, this photocatalyst was removed from the photocatalytic reaction systems by a dialyzer (Millipore, Millex-LH 0.45  $\mu\text{m}$ ).

#### **4. Photoelectrochemical measurements**

The photoelectric conversion properties were investigated in a conventional three-electrode cell by using computer-controlled electrochemical workstation (CHI 650A). Firstly, 50 mg catalysts was suspended in 2 mL nafion aqueous solution (1 wt %), the mixtures were ultrasonically scattered for 10 min to form homogeneous solution. Then, 0.1 mL solution was dropped on the Fluorine doped tin oxide (FTO) glass ( $0.5 \times 4$  cm). After evaporation of the water in air, the catalyst was attached on the FTO glass surface. A Pt wire, saturated calomel electrode (SCE), and 0.1 M sodium sulfate were used as the working electrode, the counter-electrode, the reference electrode, and the electrolyte, respectively. The current-time (i-t) curves were collected at 1 V vs SCE. The light source was a 300W Xe lamp, and a cutoff filter of 420 nm was employed for the visible-light irradiation.

#### **5. Characterizations**

The morphologies of the samples were carried out on a field-emission scanning electron microscope (FE-SEM, JSM-6701F, JEOL) operated at an accelerating voltage of 5 kV. X-ray diffraction (XRD) measurements were performed on X' pert PRO diffractometer using  $\text{Cu K}\alpha$  radiation (40 kV). The XRD patterns were recorded from  $10^\circ$  to  $90^\circ$  with a scanning rate of  $0.067^\circ/\text{s}$ . X-ray photoelectron spectroscopy (XPS) was observed by an ESCALAB 250 Xi XPS system of Thermo Fisher Scientific, England and excited by monochromatic  $\text{Al K}\alpha$  radiation (1486.6 eV) as the excitation source to analyze samples' elemental composition. UV-vis absorption spectra were measured on a Shimadzu UV-2550 spectrophotometer by using  $\text{BaSO}_4$  as the reference at room temperature.

Additional Figures and Discussions

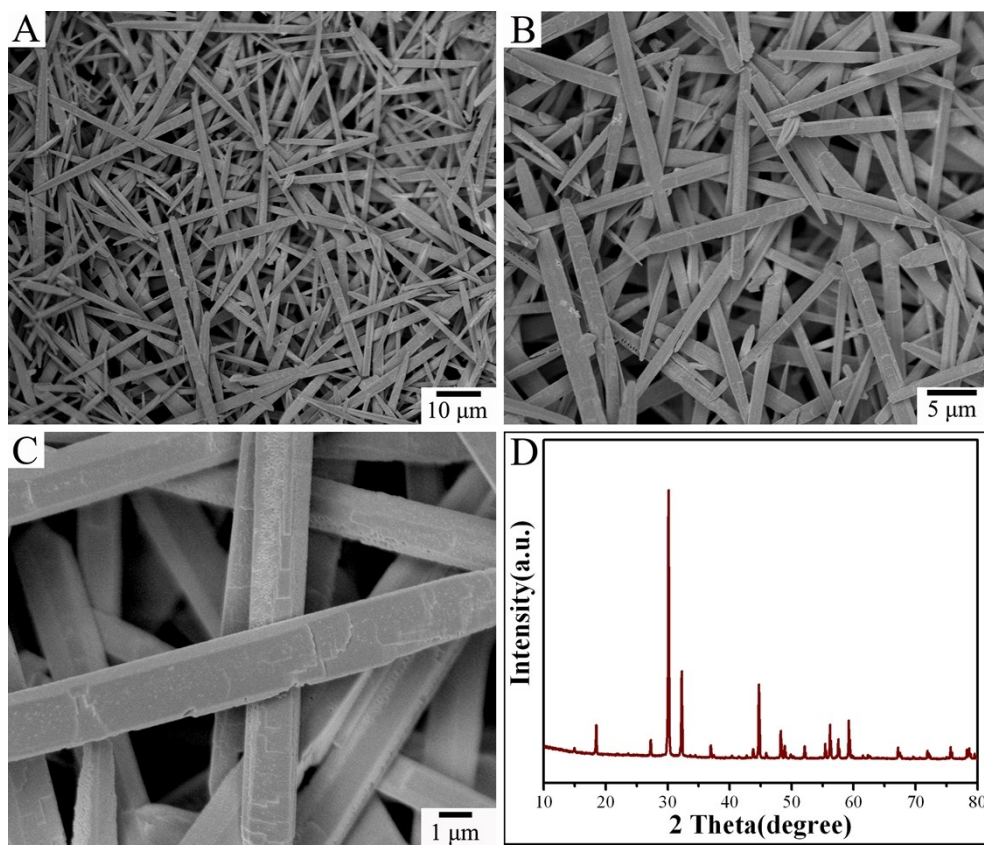

**Fig. S1** (A, B, C) SEM images of  $\text{Ag}_2\text{WO}_4$  microrods with different magnifications; (D) XRD pattern of the  $\text{Ag}_2\text{WO}_4$  microrods.

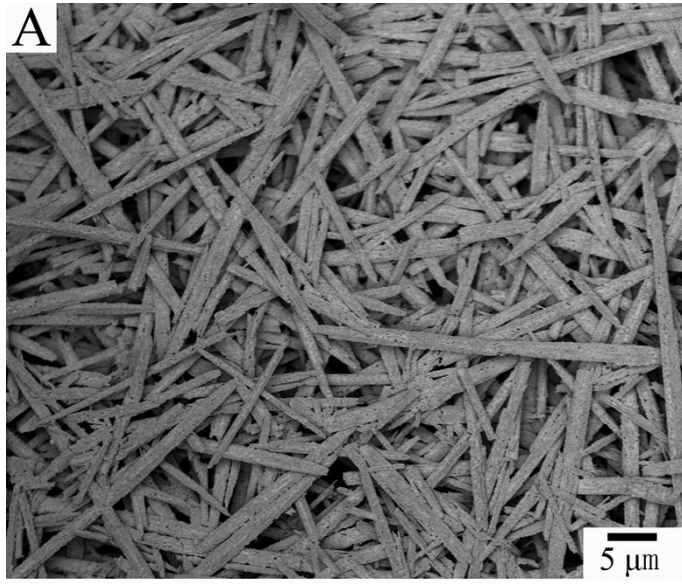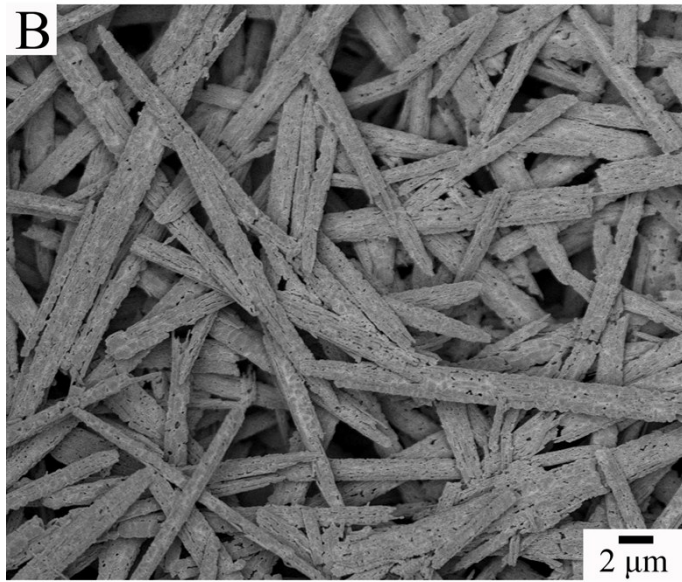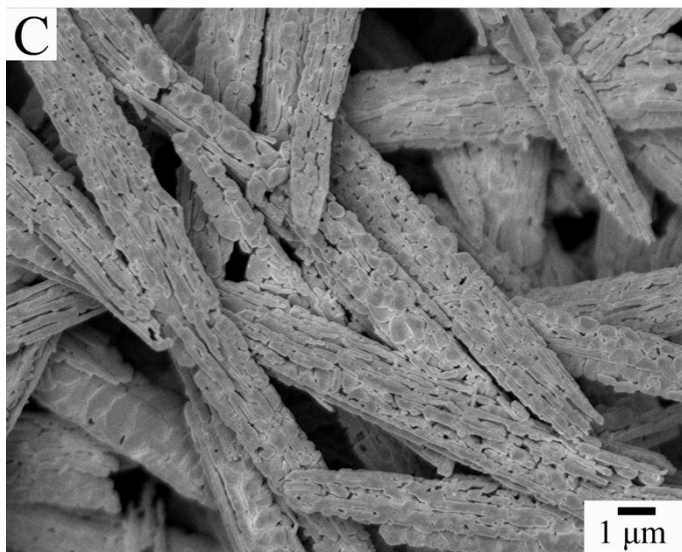

**Fig. S2** SEM images of the hollow porous  $\text{Ag}_3\text{PO}_4$  microrods with different magnifications.

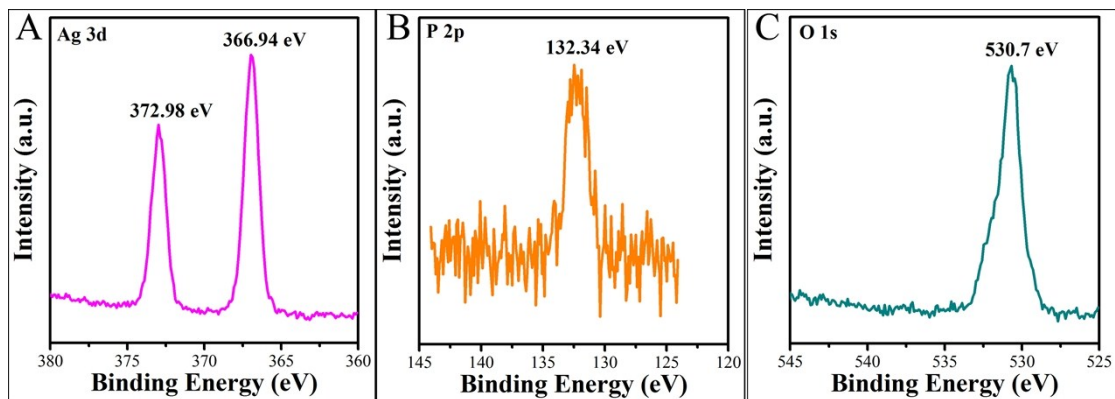

**Fig. S3** XPS spectra of the banded  $\text{Ag}_3\text{PO}_4$  product: (A) Ag 3d region; (B) P 2p region; (C) O 1s region.

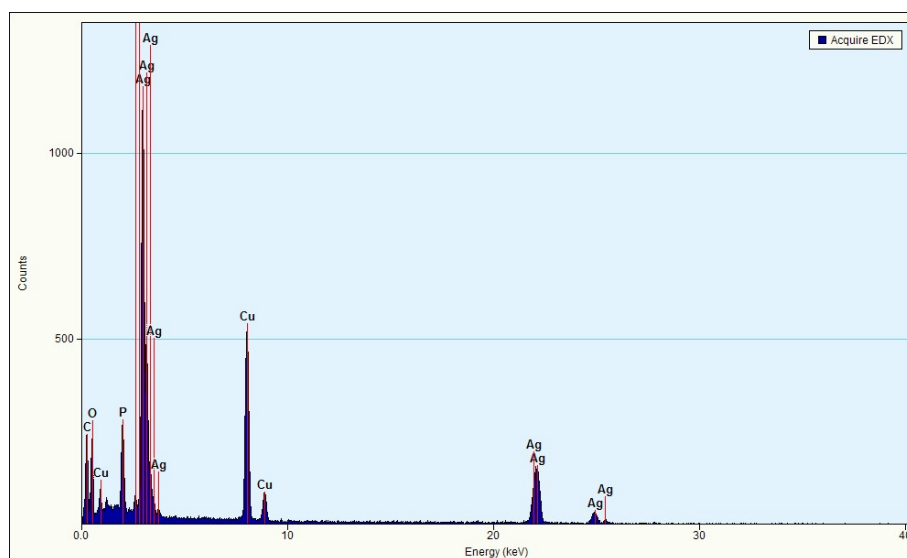

**Fig. S4** EDS spectra of the as-synthesized  $\text{Ag}_3\text{PO}_4$  microrods.
